# Supplementary material for: High prevalence of clonal hematopoiesis‐type genomic abnormalities in cell‐free DNA in invasive gliomas after treatment
Source: PubMed Central journal article supplement (PMC8048515; doi:10.1002/ijc.33481), 2021-02-05

## SUPPLEMENTARY MATERIALS

### High Prevalence of Clonal Hematopoiesis-type Genomic Abnormalities in Cell-free DNA in Invasive Gliomas After Treatment

Ryosuke Okamura<sup>1\*</sup>, David E. Piccioni<sup>1, 2\*</sup>, Amélie Boichard<sup>1</sup>, Suzanna Lee<sup>1</sup>, Rebecca E. Jimenez<sup>1</sup>,  
Jason K. Sicklick<sup>1, 3</sup>, Shumei Kato<sup>1</sup>, and Razelle Kurzrock<sup>1</sup>

#### CONTENTS

##### Supplementary Tables

- **Supplementary Table S1.** Next-generation sequencing gene panels for blood-derived cfDNA (*Guardant, Inc.*) (N=135).
- **Supplementary Table S2.** Next-generation sequencing gene panels for tissue-DNA (N=88).
- **Supplementary Table S3.** Detailed information of invasive glioma patients harboring characterized cfDNA alterations (N=28).
- **Supplementary Table S4.** Presence of characterized cfDNA alterations and overall survival time from blood draw for cfDNA in invasive glioma patients (N=135).

##### Supplementary Figures

- **Supplementary Figure S1.** Frequency (% of patients) of genomic alterations in tissue-DNA NGS among glioma patients (N=88). Only characterized alterations are shown. A total of 89 different genes were involved (only genes altered in  $\geq 2$  samples are shown).
- **Supplementary Figure S2.** Kaplan-Meier curve for overall survival (OS) from cfDNA blood test depending on the number of characterized cfDNA alterations amongst patients with brain gliomas (N=135).
- **Supplementary Figure S3.** Detection rate of characterized cfDNA alterations among GBM patients according to presence of tumor diagnosis (N=93).

**Supplementary Table S1.** Next-generation sequencing gene panels for blood-derived cfDNA (*Guardant, Inc.*) (N=135).

**Panel S1A.** 54 gene panel (N=45 samples).

| POINT MUTATIONS |              |               |                | AMPLIFICATIONS |
|-----------------|--------------|---------------|----------------|----------------|
| <i>ABL1</i>     | <i>AKT1</i>  | <b>ALK</b>    | <b>APC</b>     | <i>EGFR</i>    |
| <b>AR</b>       | <i>ATM</i>   | <b>BRAF</b>   | <b>CDKN2A</b>  | <i>ERBB2</i>   |
| <i>CDH1</i>     | <i>CSF1R</i> | <i>CTNNB1</i> | <b>EGFR</b>    | <i>MET</i>     |
| <b>ERBB2</b>    | <i>ERBB4</i> | <i>EZH2</i>   | <b>FBXW7</b>   |                |
| <i>FGFR1</i>    | <i>FGFR2</i> | <i>FGFR3</i>  | <i>FLT3</i>    |                |
| <i>GNA11</i>    | <i>GNAQ</i>  | <i>GNAS</i>   | <i>HNF1A</i>   |                |
| <i>HRAS</i>     | <i>IDH1</i>  | <i>IDH2</i>   | <i>JAK2</i>    |                |
| <i>JAK3</i>     | <i>KDR</i>   | <i>KIT</i>    | <b>KRAS</b>    |                |
| <b>MET</b>      | <i>MLH1</i>  | <i>MPL</i>    | <b>MYC</b>     |                |
| <b>NOTCH1</b>   | <i>NPM1</i>  | <b>NRAS</b>   | <i>PDGFRA</i>  |                |
| <b>PIK3CA</b>   | <b>PTEN</b>  | <i>PTPN11</i> | <b>PROC</b>    |                |
| <b>RB1</b>      | <i>RET</i>   | <i>SMAD4</i>  | <i>SMARCB1</i> |                |
| <i>SMO</i>      | <i>SRC</i>   | <i>STK11</i>  | <i>TERT</i>    |                |
| <b>TP53</b>     | <i>VHL</i>   |               |                |                |

All exons were sequenced in genes in **bold**.

**Panel S1B.** 68 gene panel (N=61 samples).

| POINT MUTATIONS |               |               |               | AMPLIFICATIONS | FUSIONS      | INDELS                         |
|-----------------|---------------|---------------|---------------|----------------|--------------|--------------------------------|
| <i>AKT1</i>     | <i>ALK</i>    | <b>APC</b>    | <b>AR</b>     | <i>AR</i>      | <i>ALK</i>   | <i>EGFR</i> exon 19 deletions  |
| <i>ARAF</i>     | <b>ARID1A</b> | <i>ATM</i>    | <b>BRAF</b>   | <i>BRAF</i>    | <i>NTRK1</i> | <i>EGFR</i> exon 20 insertions |
| <b>BRCA1</b>    | <b>BRCA2</b>  | <b>CCDN1</b>  | <b>CCDN2</b>  | <i>CCNE1</i>   | <i>RET</i>   |                                |
| <b>CCNE1</b>    | <i>CDH1</i>   | <b>CDK4</b>   | <b>CDK6</b>   | <i>CDK4</i>    | <i>ROS1</i>  |                                |
| <b>CDKN2A</b>   | <b>CDKN2B</b> | <i>CTNNB1</i> | <b>EGFR</b>   | <i>CDK6</i>    |              |                                |
| <b>ERBB2</b>    | <i>ESR1</i>   | <i>EZH2</i>   | <i>FBXW7</i>  | <i>EGFR</i>    |              |                                |
| <b>FGFR1</b>    | <b>FGFR2</b>  | <i>FGFR3</i>  | <i>GATA3</i>  | <i>ERBB2</i>   |              |                                |
| <i>GNA11</i>    | <i>GNAQ</i>   | <i>GNAS</i>   | <i>HNF1A</i>  | <i>FGFR1</i>   |              |                                |
| <b>HRAS</b>     | <i>IDH1</i>   | <i>IDH2</i>   | <i>JAK2</i>   | <i>FGFR2</i>   |              |                                |
| <i>JAK3</i>     | <b>KIT</b>    | <b>KRAS</b>   | <i>MAP2K1</i> | <i>KIT</i>     |              |                                |
| <i>MAP2K2</i>   | <b>MET</b>    | <i>MLH1</i>   | <i>MPL</i>    | <i>KRAS</i>    |              |                                |
| <b>MYC</b>      | <b>NF1</b>    | <i>NFE2L2</i> | <i>NOTCH1</i> | <i>MET</i>     |              |                                |
| <i>NPM1</i>     | <b>NRAS</b>   | <i>NTRK1</i>  | <b>PDGFRA</b> | <i>MYC</i>     |              |                                |
| <b>PIK3CA</b>   | <b>PTEN</b>   | <i>PTPN11</i> | <b>RAF1</b>   | <i>PDGFRA</i>  |              |                                |
| <i>RET</i>      | <i>RHEB</i>   | <i>RHOA</i>   | <i>RIT1</i>   | <i>PIK3CA</i>  |              |                                |
| <i>ROS1</i>     | <i>SMAD4</i>  | <i>SMO</i>    | <i>SRC</i>    | <i>RAF1</i>    |              |                                |
| <i>STK11</i>    | <i>TERT</i>   | <b>TP53</b>   | <i>VHL</i>    |                |              |                                |

Complete exon coverage for genes in **bold**.

**Panel S1C.** 70 gene panel (N=3 samples).

| POINT MUTATIONS |               |               |               | AMPLIFICATIONS | FUSIONS      | INDELS                          |
|-----------------|---------------|---------------|---------------|----------------|--------------|---------------------------------|
| <i>AKT1</i>     | <i>ALK*</i>   | <b>APC</b>    | <b>AR</b>     | <i>AR</i>      | <i>ALK</i>   | <i>EGFR</i> exon 19 deletions   |
| <i>ARAF</i>     | <b>ARID1A</b> | <i>ATM</i>    | <b>BRAF</b>   | <i>BRAF</i>    | <i>FGFR2</i> | <i>EGFR</i> exon 20 insertions  |
| <b>BRCA1</b>    | <b>BRCA2</b>  | <b>CCND1</b>  | <b>CCND2</b>  | <i>CCND1</i>   | <i>FGFR3</i> | <i>ERBB2</i> exon 19 deletions  |
| <b>CCNE1</b>    | <i>CDH1</i>   | <b>CDK4</b>   | <b>CDK6</b>   | <i>CCND2</i>   | <i>NTRK1</i> | <i>ERBB2</i> exon 20 insertions |
| <b>CDKN2A</b>   | <b>CDKN2B</b> | <i>CTNNB1</i> | <b>EGFR</b>   | <i>CCNE1</i>   | <i>RET</i>   |                                 |
| <b>ERBB2</b>    | <i>ESR1</i>   | <i>EZH2</i>   | <i>FBXW7</i>  | <i>CDK4</i>    | <i>ROS1</i>  |                                 |
| <b>FGFR1</b>    | <b>FGFR2*</b> | <i>FGFR3*</i> | <i>GATA3</i>  | <i>CDK6</i>    |              |                                 |
| <i>GNA11</i>    | <i>GNAQ</i>   | <i>GNAS</i>   | <i>HNF1A</i>  | <i>EGFR</i>    |              |                                 |
| <b>HRAS</b>     | <i>IDH1</i>   | <i>IDH2</i>   | <i>JAK2</i>   | <i>ERBB2</i>   |              |                                 |
| <i>JAK3</i>     | <b>KIT</b>    | <b>KRAS</b>   | <i>MAP2K1</i> | <i>FGFR1</i>   |              |                                 |
| <i>MAP2K2</i>   | <b>MET</b>    | <i>MLH1</i>   | <i>MPL</i>    | <i>FGFR2</i>   |              |                                 |
| <b>MYC</b>      | <b>NF1</b>    | <i>NFE2L2</i> | <i>NOTCH1</i> | <i>KIT</i>     |              |                                 |
| <i>NPM1</i>     | <b>NRAS</b>   | <i>NTRK1*</i> | <b>PDGFRA</b> | <i>KRAS</i>    |              |                                 |
| <b>PIK3CA</b>   | <b>PTEN</b>   | <i>PTPN11</i> | <b>RAF1</b>   | <i>MET</i>     |              |                                 |
| <b>RB1</b>      | <i>RET*</i>   | <i>RHEB</i>   | <i>RHOA</i>   | <i>MYC</i>     |              |                                 |
| <i>RIT1</i>     | <i>ROS1*</i>  | <i>SMAD4</i>  | <i>SMO</i>    | <i>PDGFRA</i>  |              |                                 |
| <i>SRC</i>      | <i>STK11</i>  | <i>TERT</i>   | <b>TP53</b>   | <i>PIK3CA</i>  |              |                                 |
| <i>TSC1</i>     | <i>VHL</i>    |               |               | <i>RAF1</i>    |              |                                 |

Complete exon and partial intron coverage for genes in **bold**. \*Genes with asterisk include rearrangements. *MET* includes exon 14 skipping.

**Panel S1D.** 73 gene panel (N=26 samples).

| POINT MUTATIONS |               |               |               | AMPLIFICATIONS | FUSIONS      | INDELS        |               |
|-----------------|---------------|---------------|---------------|----------------|--------------|---------------|---------------|
| <i>AKT1</i>     | <i>ALK</i>    | <i>APC</i>    | <i>AR</i>     | <i>AR</i>      | <i>ALK</i>   | <i>APC</i>    | <i>ARID1A</i> |
| <i>ARAF</i>     | <i>ARID1A</i> | <i>ATM</i>    | <i>BRAF</i>   | <i>BRAF</i>    | <i>FGFR2</i> | <i>ATM</i>    | <i>BRCA1</i>  |
| <i>BRCA1</i>    | <i>BRCA2</i>  | <i>CCND1</i>  | <i>CCND2</i>  | <i>CCND1</i>   | <i>FGFR3</i> | <i>BRCA2</i>  | <i>CDH1</i>   |
| <i>CCNE1</i>    | <i>CDH1</i>   | <i>CDK4</i>   | <i>CDK6</i>   | <i>CCNE1</i>   | <i>NTRK1</i> | <i>CDKN2A</i> | <i>EGFR</i>   |
| <i>CDKN2A</i>   | <i>CTNNB1</i> | <i>DDR2</i>   | <i>EGFR</i>   | <i>CDK4</i>    | <i>RET</i>   | <i>GATA3</i>  | <i>KIT</i>    |
| <i>ERBB2</i>    | <i>ESR1</i>   | <i>EZH2</i>   | <i>FBXW7</i>  | <i>CDK6</i>    | <i>ROS1</i>  | <i>MET</i>    | <i>MLH1</i>   |
| <i>FGFR1</i>    | <i>FGFR2</i>  | <i>FGFR3</i>  | <i>GATA3</i>  | <i>EGFR</i>    |              | <i>MTOR</i>   | <i>NF1</i>    |
| <i>GNA11</i>    | <i>GNAQ</i>   | <i>GNAS</i>   | <i>HNF1A</i>  | <i>ERBB2</i>   |              | <i>PDGFRA</i> | <i>PTEN</i>   |
| <i>HRAS</i>     | <i>IDH1</i>   | <i>IDH2</i>   | <i>JAK2</i>   | <i>FGFR1</i>   |              | <i>RB1</i>    | <i>SMAD4</i>  |
| <i>JAK3</i>     | <i>KIT</i>    | <i>KRAS</i>   | <i>MAP2K1</i> | <i>FGFR2</i>   |              | <i>STK11</i>  | <i>TP53</i>   |
| <i>MAP2K2</i>   | <i>MAPK1</i>  | <i>MAPK3</i>  | <i>MET</i>    | <i>KIT</i>     |              | <i>TSC1</i>   | <i>VHL</i>    |
| <i>MLH1</i>     | <i>MPL</i>    | <i>MTOR</i>   | <i>MYC</i>    | <i>KRAS</i>    |              |               |               |
| <i>NF1</i>      | <i>NFE2L2</i> | <i>NOTCH1</i> | <i>NPM1</i>   | <i>MET</i>     |              |               |               |
| <i>NRAS</i>     | <i>NTRK1</i>  | <i>NTRK3</i>  | <i>PDGFRA</i> | <i>MYC</i>     |              |               |               |
| <i>PIK3CA</i>   | <i>PTEN</i>   | <i>PTPN11</i> | <i>RAF1</i>   | <i>PDGFRA</i>  |              |               |               |
| <i>RB1</i>      | <i>RET</i>    | <i>RHEB</i>   | <i>RHOA</i>   | <i>PIK3CA</i>  |              |               |               |
| <i>RIT1</i>     | <i>ROS1</i>   | <i>SMAD4</i>  | <i>SMO</i>    | <i>RAF1</i>    |              |               |               |
| <i>STK11</i>    | <i>TERT</i>   | <i>TP53</i>   | <i>TSC1</i>   |                |              |               |               |
| <i>VHL</i>      |               |               |               |                |              |               |               |

All clinically relevant exons for 73 genes are sequenced. *TERT* includes alterations in the promoter region. *MET* includes exon 14 skipping.



**Panel S2B.** 315 gene panel of tissue-DNA (*Foundation Medicine, Inc*) (N=52 tissue samples).

| <b>SUBSTITUTIONS, INSERTION/DELETIONS, AND COPY NUMBER ALTERATIONS</b> |         |          |          |         |         |        |         |          |
|------------------------------------------------------------------------|---------|----------|----------|---------|---------|--------|---------|----------|
| ABL1                                                                   | ABL2    | ACVR1B   | AKT1     | AKT2    | AKT3    | ALK    | AMER1   | APC      |
| AR                                                                     | ARAF    | ARFRP1   | ARID1A   | ARID1B  | ARID2   | ASXL1  | ATM     | ATR      |
| ATRX                                                                   | AURKA   | AURKB    | AXIN1    | AXL     | BAP1    | BARD1  | BCL2    | BCL2L1   |
| BCL2L2                                                                 | BCL6    | BCOR     | BCORL1   | BLM     | BRAF    | BRCA1  | BRCA2   | BRD4     |
| BRIP1                                                                  | BTG1    | BTK      | C11orf30 | CARD11  | CBFB    | CBL    | CCND1   | CCND2    |
| CCND3                                                                  | CCNE1   | CD274    | CD79A    | CD79B   | CDC73   | CDH1   | CDK12   | CDK4     |
| CDK6                                                                   | CDK8    | CDKN1A   | CDKN1B   | CDKN2A  | CDKN2B  | CDKN2C | CEBPA   | CHD2     |
| CHD4                                                                   | CHEK1   | CHEK2    | CIC      | CREBBP  | CRKL    | CRLF2  | CSF1R   | CTCF     |
| CTNNA1                                                                 | CTNNB1  | CUL3     | CYLD     | DAXX    | DDR2    | DICER1 | DNMT3A  | DOT1L    |
| EGFR                                                                   | EP300   | EPHA3    | EPHA5    | EPHA7   | EPHB1   | ERBB2  | ERBB3   | ERBB4    |
| ERG                                                                    | ERRFI1  | ESR1     | EZH2     | FAM46C  | FANCA   | FANCC  | FANCD2  | FANCE    |
| FANCF                                                                  | FANCG   | FANCL    | FAS      | FAT1    | FBXW7   | FGF10  | FGF14   | FGF19    |
| FGF23                                                                  | FGF3    | FGF4     | FGF6     | FGFR1   | FGFR2   | FGFR3  | FGFR4   | FH       |
| FLCN                                                                   | FLT1    | FLT3     | FLT4     | FOXL2   | FOXP1   | FRS2   | FUBP1   | GABRA6   |
| GATA1                                                                  | GATA2   | GATA3    | GATA4    | GATA6   | GID4    | GLI1   | GNA11   | GNA13    |
| GNAQ                                                                   | GNAS    | GPR124   | GRIN2A   | GRM3    | GSK3B   | H3F3A  | HGF     | HNF1A    |
| HRAS                                                                   | HSD3B1  | HSP90AA1 | IDH1     | IDH2    | IGF1R   | IGF2   | IKBKE   | IKZF1    |
| IL7R                                                                   | INHBA   | INPP4B   | IRF2     | IRF4    | IRS2    | JAK1   | JAK2    | JAK3     |
| JUN                                                                    | KAT6A   | KDM5A    | KDM5C    | KDM6A   | KDR     | KEAP1  | KEL     | KIT      |
| KLHL6                                                                  | KMT2A   | KMT2C    | KMT2D    | KRAS    | LMO1    | LRP1B  | LYN     | LZTR1    |
| MAGI2                                                                  | MAP2K1  | MAP2K2   | MAP2K4   | MAP3K1  | MCL1    | MDM2   | MDM4    | MED12    |
| MEF2B                                                                  | MEN1    | MET      | MITF     | MLH1    | MPL     | MRE11A | MSH2    | MSH6     |
| MTOR                                                                   | MUTYH   | MYC      | MYCL     | MYCN    | MYD88   | NF1    | NF2     | NFE2L2   |
| NFKBIA                                                                 | NKX2-1  | NOTCH1   | NOTCH2   | NOTCH3  | NPM1    | NRAS   | NSD1    | NTRK1    |
| NTRK2                                                                  | NTRK3   | NUP93    | PAK3     | PALB2   | PARK2   | PAX5   | PBRM1   | PDCD1LG2 |
| PDGFRA                                                                 | PDGFRB  | PKD1     | PIK3C2B  | PIK3CA  | PIK3CB  | PIK3CG | PIK3R1  | PIK3R2   |
| PLCG2                                                                  | PMS2    | POLD1    | POLE     | PPP2R1A | PRDM1   | PREX2  | PRKAR1A | PRKCI    |
| PRKDC                                                                  | PRSS8   | PTCH1    | PTEN     | PTPN11  | QKI     | RAC1   | RAD50   | RAD51    |
| RAF1                                                                   | RANBP2  | RARA     | RB1      | RBM10   | RET     | RICTOR | RNF43   | ROS1     |
| RPTOR                                                                  | RUNX1   | RUNX1T1  | SDHA     | SDHB    | SDHC    | SDHD   | SETD2   | SF3B1    |
| SLIT2                                                                  | SMAD2   | SMAD3    | SMAD4    | SMARCA4 | SMARCB1 | SMO    | SNCAIP  | SOCS1    |
| SOX10                                                                  | SOX2    | SOX9     | SPEN     | SPOP    | SPTA1   | SRC    | STAG2   | STAT3    |
| STAT4                                                                  | STK11   | SUFU     | SYK      | TAF1    | TBX3    | TERC   | TERT*   | TET2     |
| TGFBR2                                                                 | TNFAIP3 | TNFRSF14 | TOP1     | TOP2A   | TP53    | TSC1   | TSC2    | TSHR     |
| U2AF1                                                                  | VEGFA   | VHL      | WISP3    | WT1     | XPO1    | ZBTB2  | ZNF217  | ZNF703   |
| <b>REARRANGEMENTS</b>                                                  |         |          |          |         |         |        |         |          |
| ALK                                                                    | BCL2    | BCR      | BRAF     | BRCA1   | BRCA2   | BRD4   | EGFR    | ETV1     |
| ETV4                                                                   | ETV5    | ETV6     | FGFR1    | FGFR2   | FGFR3   | KIT    | MSH2    | MYB      |
| MYC                                                                    | NOTCH2  | NTRK1    | NTRK2    | PDGFRA  | RAF1    | RARA   | RET     | ROS1     |
| TMPRSS2                                                                |         |          |          |         |         |        |         |          |

\*TERT promoter region

**Panel S2C.** 324 gene panel of tissue-DNA (*Foundation Medicine, Inc*) (N=5 tissue samples).

| <b>SUBSTITUTIONS, INSERTION/DELETIONS, AND COPY NUMBER ALTERATIONS</b> |          |          |         |         |         |         |          |         |
|------------------------------------------------------------------------|----------|----------|---------|---------|---------|---------|----------|---------|
| ABL1                                                                   | ACVR1B   | AKT1     | AKT2    | AKT3    | ALK     | ALOX12B | AMER1    | APC     |
| AR                                                                     | ARAF     | ARFRP1   | ARID1A  | ASXL1   | ATM     | ATR     | ATRX     | AURKA   |
| AURKB                                                                  | AXIN1    | AXL      | BAP1    | BARD1   | BCL2    | BCL2L1  | BCL2L2   | BCL6    |
| BCOR                                                                   | BCORL1   | BRAF     | BRCA1   | BRCA2   | BRD4    | BRIP1   | BTG1     | BTG2    |
| BTK                                                                    | C11orf30 | C17orf39 | CALR    | CARD11  | CASP8   | CBFB    | CBL      | CCND1   |
| CCND2                                                                  | CCND3    | CCNE1    | CD22    | CD274   | CD70    | CD79A   | CD79B    | CDC73   |
| CDH1                                                                   | CDK12    | CDK4     | CDK6    | CDK8    | CDKN1A  | CDKN1B  | CDKN2A   | CDKN2B  |
| CDKN2C                                                                 | CEBPA    | CHEK1    | CHEK2   | CIC     | CREBBP  | CRKL    | CSF1R    | CSF3R   |
| CTCF                                                                   | CTNNA1   | CTNNB1   | CUL3    | CUL4A   | CXCR4   | CYP17A1 | DAXX     | DDR1    |
| DDR2                                                                   | DIS3     | DNMT3A   | DOT1L   | EED     | EGFR    | EP300   | EPHA3    | EPHB1   |
| EPHB4                                                                  | ERBB2    | ERBB3    | ERBB4   | ERCC4   | ERG     | ERRFI1  | ESR1     | EZH2    |
| FAM46C                                                                 | FANCA    | FANCC    | FANCG   | FANCL   | FAS     | FBXW7   | FGF10    | FGF12   |
| FGF14                                                                  | FGF19    | FGF23    | FGF3    | FGF4    | FGF6    | FGFR1   | FGFR2    | FGFR3   |
| FGFR4                                                                  | FH       | FLCN     | FLT1    | FLT3    | FOXL2   | FUBP1   | GABRA6   | GATA3   |
| GATA4                                                                  | GATA6    | GNA11    | GNA13   | GNAQ    | GNAS    | GRM3    | GSK3B    | H3F3A   |
| HDAC1                                                                  | HGF      | HNF1A    | HRAS    | HSD3B1  | ID3     | IDH1    | IDH2     | IGF1R   |
| IKBKE                                                                  | IKZF1    | INPP4B   | IRF2    | IRF4    | IRS2    | JAK1    | JAK2     | JAK3    |
| JUN                                                                    | KDM5A    | KDM5C    | KDM6A   | KDR     | KEAP1   | KEL     | KIT      | KLHL6   |
| KMT2A                                                                  | KMT2D    | KRAS     | LTK     | LYN     | MAF     | MAP2K1  | MAP2K2   | MAP2K4  |
| MAP3K1                                                                 | MAP3K13  | MAPK1    | MCL1    | MDM2    | MDM4    | MED12   | MEF2B    | MEN1    |
| MERTK                                                                  | MET      | MITF     | MKNK1   | MLH1    | MPL     | MRE11A  | MSH2     | MSH3    |
| MSH6                                                                   | MST1R    | MTAP     | MTOR    | MUTYH   | MYC     | MYCL    | MYCN     | MYD88   |
| NBN                                                                    | NF1      | NF2      | NFE2L2  | NFKBIA  | NKX2-1  | NOTCH1  | NOTCH2   | NOTCH3  |
| NPM1                                                                   | NRAS     | NSD3     | NT5C2   | NTRK1   | NTRK2   | NTRK3   | P2RY8    | PALB2   |
| PARK2                                                                  | PARP1    | PARP2    | PARP3   | PAX5    | PBRM1   | PDCD1   | PDCD1LG2 | PDGFRA  |
| PDGFRB                                                                 | PKD1     | PIK3C2B  | PIK3C2G | PIK3CA  | PIK3CB  | PIK3R1  | PIM1     | PMS2    |
| POLD1                                                                  | POLE     | PPARG    | PPP2R1A | PPP2R2A | PRDM1   | PRKAR1A | PRKCI    | PTCH1   |
| PTEN                                                                   | PTPN11   | PTPRO    | QKI     | RAC1    | RAD21   | RAD51   | RAD51B   | RAD51C  |
| RAD51D                                                                 | RAD52    | RAD54L   | RAF1    | RARA    | RB1     | RBM10   | REL      | RET     |
| RICTOR                                                                 | RNF43    | ROS1     | RPTOR   | SDHA    | SDHB    | SDHC    | SDHD     | SETD2   |
| SF3B1                                                                  | SGK1     | SMAD2    | SMAD4   | SMARCA4 | SMARCB1 | SMO     | SNCAIP   | SOCS1   |
| SOX2                                                                   | SOX9     | SPEN     | SPOP    | SRC     | STAG2   | STAT3   | STK11    | SUFU    |
| SYK                                                                    | TBX3     | TEK      | TET2    | TGFBR2  | TIPARP  | TNFAIP3 | TNFRSF14 | TP53    |
| TSC1                                                                   | TSC2     | TYRO3    | U2AF1   | VEGFA   | VHL     | WHSC1   | WT1      | XPO1    |
| XRCC2                                                                  | ZNF217   | ZNF703   |         |         |         |         |          |         |
| <b>REARRANGEMENTS</b>                                                  |          |          |         |         |         |         |          |         |
| ALK                                                                    | BCL2     | BCR      | BRAF    | BRCA1   | BRCA2   | CD74    | EGFR     | ETV4    |
| ETV5                                                                   | ETV6     | EWSR1    | EZR     | FGFR1   | FGFR2   | FGFR3   | KIT      | KMT2A   |
| MSH2                                                                   | MYB      | MYC      | NOTCH2  | NTRK1   | NTRK2   | NUTM1   | PDGFRA   | RAF1    |
| RARA                                                                   | RET      | ROS1     | RSPO2   | SDC4    | SLC34A2 | TERC    | TERT*    | TMPRSS2 |

\*TERT promoter region

**Panel S2D.** 397 gene panel of tissue-DNA (UC San Diego Health Clinical Laboratories) (N=5 tissue samples).

| <b>SINGLE NUCLEOTIDE, SMALL INSERTIONS, OR DELETIONS</b> |          |        |        |        |         |         |          |         |         |
|----------------------------------------------------------|----------|--------|--------|--------|---------|---------|----------|---------|---------|
| ABL1                                                     | ABL2     | ACVR1B | AKAP9  | AKT1   | AKT2    | AKT3    | ALK      | AMER1   | APC     |
| AR                                                       | ARAF     | ARFRP1 | ARID1A | ARID1B | ARID2   | ASPSCR1 | ASXL1    | ATF6    | ATM     |
| ATP1A1                                                   | ATP2B3   | ATR    | ATRX   | AURKA  | AURKB   | AXIN1   | AXL      | BAP1    | BARD1   |
| BCL11A                                                   | BCL11B   | BCL2   | BCL2L1 | BCL2L2 | BCL6    | BCOR    | BCORL1   | BLM     | BMPR1A  |
| BRAF                                                     | BRCA1    | BRCA2  | BRD4   | BRIP1  | BTG1    | BTK     | C11orf30 | CACNA1D | CAMTA1  |
| CARD11                                                   | CASP8    | CBFB   | CBL    | CBLB   | CCND1   | CCND2   | CCND3    | CCNE1   | CD274   |
| CD79A                                                    | CD79B    | CDC73  | CDH1   | CDH11  | CDK12   | CDK4    | CDK6     | CDK8    | CDKN1A  |
| CDKN1B                                                   | CDKN2A   | CDKN2B | CDKN2C | CEBPA  | CHD2    | CHD4    | CHEK1    | CHEK2   | CIC     |
| CLTCL1                                                   | COL1A1   | CREBBP | CRKL   | CRLF2  | CSF1R   | CSF3R   | CTCF     | CTNNA1  | CTNNB1  |
| CUL3                                                     | CYLD     | DAXX   | DDIT3  | DDR2   | DICER1  | DNM2    | DNMT3A   | DOT1L   | EBF1    |
| EGFR                                                     | EIF1AX   | EP300  | EPHA3  | EPHA5  | EPHA7   | EPHB1   | ERBB2    | ERBB3   | ERBB4   |
| ERCC3                                                    | ERCC4    | ERCC5  | ERG    | ERRF1  | ESR1    | ETV1    | ETV4     | ETV5    | ETV6    |
| EWSR1                                                    | EXT1     | EZH2   | FAM46C | FANCA  | FANCC   | FANCD2  | FANCE    | FANCF   | FANCG   |
| FANCL                                                    | FAS      | FAT1   | FBXO11 | FBXW7  | FGF10   | FGF14   | FGF19    | FGF23   | FGF3    |
| FGF4                                                     | FGF6     | FGFR1  | FGFR2  | FGFR3  | FGFR4   | FH      | FLCN     | FLT1    | FLT3    |
| FLT4                                                     | FOXA1    | FOXL2  | FOXO1  | FOXP1  | FRS2    | FUBP1   | FUS      | GABRA6  | GATA1   |
| GATA2                                                    | GATA3    | GATA4  | GATA6  | GID4   | GLI1    | GMPS    | GNA11    | GNA13   | GNAQ    |
| GNAS                                                     | GPR124   | GRIN2A | GRM3   | GSK3B  | H3F3A   | HGF     | HIP1     | HNF1A   | HRAS    |
| HSD3B1                                                   | HSP90AA1 | IDH1   | IDH2   | IGF1R  | IGF2    | IKBKE   | IKZF1    | IL7R    | INHBA   |
| INPP4B                                                   | IRF2     | IRF4   | IRS2   | ITK    | JAK1    | JAK2    | JAK3     | JUN     | KAT6A   |
| KAT6B                                                    | KDM5A    | KDM5C  | KDM6A  | KDR    | KEAP1   | KEL     | KIF5B    | KIT     | KLHL6   |
| KMT2A                                                    | KMT2D    | KRAS   | LCP1   | LIFR   | LMO1    | LRIG3   | LRP1B    | LYN     | LZTR1   |
| MAGI2                                                    | MAML2    | MAP2K1 | MAP2K2 | MAP2K4 | MAP3K1  | MCL1    | MDM2     | MDM4    | MED12   |
| MEF2B                                                    | MEN1     | MET    | MITF   | MLH1   | MLLT3   | MLLT4   | MN1      | MPL     | MRE11A  |
| MSH2                                                     | MSH6     | MTOR   | MUTYH  | MYB    | MYC     | MYCL    | MYCN     | MYD88   | MYH11   |
| MYH9                                                     | NCOA1    | NCOA2  | NF1    | NF2    | NFE2L2  | NFKBIA  | NIN      | NKX2-1  | NOTCH1  |
| NOTCH2                                                   | NOTCH3   | NPM1   | NR4A3  | NRAS   | NSD1    | NTRK1   | NTRK2    | NTRK3   | NUMA1   |
| NUP214                                                   | NUP93    | NUP98  | PAK3   | PALB2  | PARK2   | PAX3    | PAX5     | PAX7    | PBRM1   |
| PCM1                                                     | PDCD1LG2 | PDGFRA | PDGFRB | PDK1   | PIK3C2B | PIK3CA  | PIK3CB   | PIK3CG  | PIK3R1  |
| PIK3R2                                                   | PLCG2    | PMS1   | PMS2   | POLD1  | POLE    | PPARG   | PPP2R1A  | PRDM1   | PRDM16  |
| PREX2                                                    | PRKAR1A  | PRKCI  | PRKDC  | PRSS8  | PTCH1   | PTEN    | PTPN11   | PTPRC   | QKI     |
| RAC1                                                     | RAD21    | RAD50  | RAD51  | RAF1   | RALGDS  | RANBP17 | RANBP2   | RARA    | RB1     |
| RBM10                                                    | RET      | RICTOR | RNF43  | ROS1   | RPTOR   | RUNX1   | RUNX1T1  | SDHA    | SDHB    |
| SDHC                                                     | SDHD     | SETBP1 | SETD2  | SF3B1  | SLC34A2 | SLIT2   | SMAD2    | SMAD3   | SMAD4   |
| SMARCA4                                                  | SMARCB1  | SMO    | SNCAIP | SOCS1  | SOX10   | SOX2    | SOX9     | SPEN    | SPOP    |
| SPTA1                                                    | SRC      | SRGAP3 | SS18   | STAG2  | STAT3   | STAT4   | STAT5B   | STK11   | SUFU    |
| SYK                                                      | TAF1     | TBX3   | TCF7L2 | TERC   | TERT    | TET2    | TGFBR2   | THRAP3  | TMPRSS2 |
| TNFAIP3                                                  | TNFRSF14 | TOP1   | TOP2A  | TP53   | TPR     | TRIM24  | TRIM33   | TRIP11  | TRRAP   |
| TSC1                                                     | TSC2     | TSHR   | U2AF1  | VEGFA  | VHL     | WHSC1   | WISP3    | WRN     | WT1     |
| XPO1                                                     | ZBTB2    | ZMYM2  | ZNF217 | ZNF384 | ZNF521  | ZNF703  |          |         |         |
| <b>REARRANGEMENTS</b>                                    |          |        |        |        |         |         |          |         |         |
| ALK                                                      | ASPSCR1  | BRAF   | BRD4   | DDIT3  | EGFR    | ETV1    | ETV4     | ETV5    | ETV6    |
| EWSR1                                                    | FGFR1    | FGFR2  | FGFR3  | FOXO1  | FUS     | MYB     | NOTCH2   | NR4A3   | NTRK1   |
| NTRK2                                                    | PDGFRA   | PPARG  | RAF1   | RET    | ROS1    | SS18    | TMPRSS2  |         |         |

**Supplementary Table S3.** Detailed information of invasive glioma patients harboring characterized cfDNA alterations (N=28).

| ID                                                | Diagnosis (WHO grade) | Age* | Characterized alterations in cfDNA NGS (%cfDNA)                              | Prior systemic treatment to blood draw for cfDNA         | Characterized alterations in tissue DNA NGS                                                                                                                                            |
|---------------------------------------------------|-----------------------|------|------------------------------------------------------------------------------|----------------------------------------------------------|----------------------------------------------------------------------------------------------------------------------------------------------------------------------------------------|
| <b>Both cfDNA and Tissue DNA available (N=18)</b> |                       |      |                                                                              |                                                          |                                                                                                                                                                                        |
| 1                                                 | GBM (IV)              | 60   | <i>ATM</i> R3008H (0.2%)                                                     | TMZ+RT                                                   | <i>FGFR3-TACC3</i> fusion, <i>TERT</i> promoter -124C>T                                                                                                                                |
| 6                                                 | GBM (IV)              | 70   | <i>TP53</i> D281E (4.2%)                                                     | TMZ+RT; antineoplastic therapy                           | <i>EGFR</i> amplification, <i>PTEN</i> R159fs*21, <i>CDKN2A/B</i> loss, <i>TERT</i> promoter -124C>T                                                                                   |
| 14                                                | AA (III)              | 35   | <i>TP53</i> Y163C (0.1%)                                                     | TMZ+RT; lomustine; bevacizumab+irinotecan                | <i>TP53</i> P278S, <i>TP53</i> R249T, <i>IDH1</i> R132S, <i>ATRX</i> N1232fs*15                                                                                                        |
| 23                                                | AA (III)              | 52   | <i>TP53</i> V143M (0.4%)                                                     | TMZ+RT                                                   | <i>TP53</i> P142fs*28, <i>TP53</i> S241A, <i>IDH1</i> R132H, <i>ATRX</i> K1305fs*41                                                                                                    |
| 27                                                | GBM (IV)              | 71   | <i>TP53</i> Y234C (0.7%)                                                     | TMZ+RT                                                   | <i>CSF1R</i> V32G, <i>PTEN</i> I101T                                                                                                                                                   |
| 44                                                | GBM (IV)              | 62   | <i>ATM</i> R3008H (0.1%)                                                     | TMZ+RT                                                   | <i>TERT</i> promoter -124C>T, <i>PTEN</i> loss, <i>CDKN2C</i> loss, <i>CDKN2A/B</i> loss                                                                                               |
| 50                                                | AO (III)              | 45   | <i>PDGFRA</i> R500* (0.62%)                                                  | TMZ+RT; lomustine; carboplatin                           | <i>NF1</i> Y2285fs*5, <i>NF1</i> F1275fs*8, <i>NF1</i> Y1296*, <i>PIK3CA</i> Q546R, <i>PIK3R1</i> splice site 1743-2A>G, <i>IDH1</i> R132H                                             |
| 54                                                | GBM (IV)              | 70   | <i>TP53</i> Y220C (3.0%), <i>TP53</i> P152L (0.31%)                          | TMZ+RT                                                   | <i>NF1</i> loss, <i>PTEN</i> loss exons 2-9, <i>TSC2</i> loss, <i>ATR</i> R1082H, <i>TP53</i> R158H, <i>RB1</i> loss, <i>TERT</i> promoter -124C>T                                     |
| 59                                                | GBM (IV)              | 70   | <i>TP53</i> L265P (0.81%)                                                    | TMZ+RT; mipsagargin; nilotinib; bevacizumab+lomustine    | <i>BRAF</i> D594N, <i>EGFR</i> A289V, <i>EGFR</i> amplification, <i>EGFRvIII</i> , <i>PIK3CA</i> G1049R, <i>CDKN2A/B</i> loss,                                                         |
| 95                                                | GBM (IV)              | 41   | <i>TP53</i> S215R (2.34%)                                                    | TMZ+RT; bevacizumab+carboplatin; bevacizumab+lomustine   | <i>CDK4</i> amplification, <i>PTEN</i> R130*, <i>MDM2</i> amplification, <i>ARID2</i> S660*, <i>TERT</i> promoter -124C>T                                                              |
| 101                                               | GBM (IV)              | 61   | <i>TP53</i> V143M (0.2%)                                                     | TMZ+RT                                                   | <i>NF1</i> K938*, <i>PTEN</i> N276fs*15                                                                                                                                                |
| 105                                               | AA (III)              | 25   | <i>IDH1</i> R132H (2%)                                                       | TMZ+RT                                                   | <i>IDH1</i> R132H, <i>NOTCH1</i> F357del, <i>TP53</i> E285K, <i>TP53</i> splice site 719_782+43del107, <i>ATRX</i> D2010fs*1, <i>FUBP1</i> Q365*                                       |
| 107                                               | AA (III)              | 81   | <i>JAK2</i> V617F (0.3%)                                                     | TMZ+RT                                                   | <i>EGFR</i> amplification, <i>EGFRvIII</i> , <i>CDKN2A/B</i> loss, <i>TERT</i> promoter-124C>T                                                                                         |
| 111                                               | GBM (IV)              | 48   | <i>TP53</i> R249S (0.3%)                                                     | TMZ+RT                                                   | <i>EGFR</i> A289V, <i>EGFR</i> amplification, <i>EGFR</i> V292L, <i>PTEN</i> R130*, <i>CDKN2A/B</i> loss, <i>MTAP</i> loss exons 2-8, <i>STAG2</i> R259*, <i>TERT</i> promoter -124C>T |
| 114                                               | OD (II)               | 43   | <i>GNAS</i> R201C (0.4%)                                                     | No systemic treatment (surgical resection and radiation) | <i>IDH1</i> R132H, <i>ERBB4</i> R838Q, <i>TERT</i> promoter -146C>T                                                                                                                    |
| 120                                               | GBM (IV)              | 54   | <i>EGFR</i> A289V (0.5%), <i>TP53</i> S241F (0.2%), <i>TP53</i> I254S (0.1%) | TMZ+RT; bevacizumab                                      | <i>EGFR</i> A289V, <i>EGFR</i> amplification, <i>EGFRvIII</i> , <i>MDM4</i> amplification, <i>CDKN2A/B</i> loss, <i>PIK3C2B</i> amplification                                          |



|                                    |          |    |                                                                                    |                                                                          |                                                                                                                                      |
|------------------------------------|----------|----|------------------------------------------------------------------------------------|--------------------------------------------------------------------------|--------------------------------------------------------------------------------------------------------------------------------------|
| 123                                | GBM (IV) | 59 | <i>JAK2</i> V617F (0.3%),<br><i>GNAS</i> R201H (0.3%)                              | TMZ+RT; optune+TMZ                                                       | <i>PTEN</i> Splice site axon 9, <i>RB1</i> E675Sfs*16, <i>TP53</i> R249S                                                             |
| 125                                | AA (III) | 40 | <i>TP53</i> Y220C (0.9%),<br><i>TP53</i> C238_M243del (0.1%)                       | TMZ+RT;<br>lomustine+procarbazine+vincristine;<br>bevacizumab+irinotecan | <i>NF1</i> F1247fs*18, <i>NF1</i> I275fs*14,<br><i>PTCH1</i> G1212S, <i>IDH1</i> R132S,<br><i>ATRX</i> T1582fs*24, <i>TP53</i> R249G |
| <b>Only cfDNA available (N=10)</b> |          |    |                                                                                    |                                                                          |                                                                                                                                      |
| 2                                  | GBM (IV) | 61 | <i>MET</i> amplification**                                                         | TMZ+RT; bevacizumab+carboplatin                                          | No tissue NGS results                                                                                                                |
| 16                                 | GBM (IV) | 45 | <i>JAK2</i> V617F (0.3%)                                                           | TMZ+RT                                                                   | No tissue NGS results                                                                                                                |
| 30                                 | GBM (IV) | 56 | <i>TP53</i> P152S (1.2%)                                                           | TMZ+RT                                                                   | No tissue NGS results                                                                                                                |
| 38                                 | GBM (IV) | 67 | <i>BRAF</i> Q257R (0.5%)                                                           | TMZ+RT                                                                   | No tissue NGS results                                                                                                                |
| 66                                 | GBM (IV) | 47 | <i>BRCA1</i> Q380*<br>(0.11%)                                                      | TMZ+RT; bevacizumab                                                      | No tissue NGS results                                                                                                                |
| 79                                 | GBM (IV) | 66 | <i>TP53</i> R280I (0.2%)                                                           | TMZ+RT; mipsagargin; nilotinib                                           | No tissue NGS results                                                                                                                |
| 82                                 | GBM (IV) | 54 | <i>TP53</i> C238S (1.41%)                                                          | TMZ+RT; bevacizumab+lomustine                                            | No tissue NGS results                                                                                                                |
| 113                                | GBM (IV) | 63 | <i>TP53</i> E258K (0.2%),<br><i>FBXW7</i> R465H<br>(0.1%)                          | TMZ+RT; bevacizumab;<br>bevacizumab+lomustine                            | No tissue NGS results                                                                                                                |
| 115                                | GBM (IV) | 59 | <i>TP53</i> G245S (2.9%),<br><i>TP53</i> R213* (0.3%)                              | TMZ+RT                                                                   | No tissue NGS results                                                                                                                |
| 128                                | GBM (IV) | 59 | <i>TP53</i> F134C (0.4%),<br><i>TP53</i> G199E (0.2%),<br><i>NF1</i> G672fs (0.1%) | TMZ+RT                                                                   | No tissue NGS results                                                                                                                |

\* At the time of blood draw for cfDNA (years).

\*\* %cfDNA is not calculated for genomic amplifications.

**Abbreviations:** AA, anaplastic astrocytoma; AO, anaplastic oligodendroglioma; cfDNA, cell-free DNA; GBM, glioblastoma multiforme; OD, oligodendroglioma; TMZ+RT, temozolomide with concurrent radiation therapy; %cfDNA, mutant allele frequency.

**Supplementary Table S4.** Presence of characterized cfDNA alterations and overall survival time from blood draw for cfDNA in invasive glioma patients (N=135).

| ID | Diagnosis (WHO grade) | Age* | Characterized cfDNA alterations detected | OS time from blood draw for cfDNA |
|----|-----------------------|------|------------------------------------------|-----------------------------------|
| 1  | GBM (IV)              | 60   | YES                                      | 10.8                              |
| 2  | GBM (IV)              | 61   | YES                                      | 11.9                              |
| 3  | GBM (IV)              | 45   | NO                                       | 17.3                              |
| 4  | GBM (IV)              | 57   | NO                                       | 29.9                              |
| 5  | GBM (IV)              | 53   | NO                                       | 9.8                               |
| 6  | GBM (IV)              | 70   | YES                                      | 34.8                              |
| 7  | GBM (IV)              | 81   | NO                                       | 1.7+                              |
| 8  | GBM (IV)              | 75   | NO                                       | 2.7                               |
| 9  | OD (II)               | 37   | NO                                       | 16.1+                             |
| 10 | GBM (IV)              | 87   | NO                                       | 8.7+                              |
| 11 | GBM (IV)              | 46   | NO                                       | 12.5                              |
| 12 | GBM (IV)              | 31   | NO                                       | 41.7                              |
| 13 | GBM (IV)              | 46   | NO                                       | 6.3                               |
| 14 | AA (III)              | 35   | YES                                      | 6.1                               |
| 15 | OD (II)               | 69   | NO                                       | 2.1+                              |
| 16 | GBM (IV)              | 45   | YES                                      | 7.6                               |
| 17 | GBM (IV)              | 63   | NO                                       | 9.6                               |
| 18 | GBM (IV)              | 78   | NO                                       | 4.9                               |
| 19 | GBM (IV)              | 37   | NO                                       | 28                                |
| 20 | GBM (IV)              | 58   | NO                                       | 1.8                               |
| 21 | AA (III)              | 40   | NO                                       | 51.6+                             |
| 22 | AA (III)              | 51   | NO                                       | 16.6+                             |
| 23 | AA (III)              | 52   | YES                                      | 52+                               |
| 24 | GBM (IV)              | 24   | NO                                       | 6.5                               |
| 25 | AA (III)              | 41   | NO                                       | 52+                               |
| 26 | GBM (IV)              | 30   | NO                                       | 7.1                               |
| 27 | GBM (IV)              | 71   | YES                                      | 50.3+                             |
| 28 | GBM (IV)              | 49   | NO                                       | 10.5                              |
| 29 | GBM (IV)              | 52   | NO                                       | 11.3                              |
| 30 | GBM (IV)              | 56   | YES                                      | 3.5                               |
| 31 | AA (III)              | 43   | NO                                       | 50+                               |
| 32 | GBM (IV)              | 46   | NO                                       | 12.5                              |
| 33 | AO (III)              | 62   | NO                                       | 4.3                               |
| 34 | GBM (IV)              | 66   | NO                                       | 9.2+                              |
| 35 | GBM (IV)              | 64   | NO                                       | 5.8                               |
| 36 | GBM (IV)              | 38   | NO                                       | 18.5                              |
| 37 | GBM (IV)              | 56   | NO                                       | 32.9                              |
| 38 | GBM (IV)              | 67   | YES                                      | 2.7                               |
| 39 | AO (III)              | 42   | NO                                       | 5.5                               |
| 40 | OD (II)               | 56   | NO                                       | 49.9+                             |

| ID | Diagnosis (WHO grade) | Age* | Characterized cfDNA alterations detected | OS time from blood draw for cfDNA |
|----|-----------------------|------|------------------------------------------|-----------------------------------|
| 41 | GBM (IV)              | 65   | NO                                       | 18.8                              |
| 42 | AA (III)              | 31   | NO                                       | 21.7+                             |
| 43 | GBM (IV)              | 77   | NO                                       | 23.4                              |
| 44 | GBM (IV)              | 62   | YES                                      | 2.3                               |
| 45 | GBM (IV)              | 37   | NO                                       | 6.5                               |
| 46 | GBM (IV)              | 71   | NO                                       | 46.9+                             |
| 47 | GBM (IV)              | 63   | NO                                       | 15.1                              |
| 48 | GBM (IV)              | 65   | NO                                       | 44.4                              |
| 49 | GBM (IV)              | 53   | NO                                       | 4.2                               |
| 50 | AO (III)              | 45   | YES                                      | 20+                               |
| 51 | GBM (IV)              | 70   | NO                                       | 17.7                              |
| 52 | OD (II)               | 52   | NO                                       | 14.3+                             |
| 53 | GBM (IV)              | 48   | NO                                       | 2.2                               |
| 54 | GBM (IV)              | 70   | YES                                      | 11.8                              |
| 55 | GBM (IV)              | 57   | NO                                       | 5.2                               |
| 56 | DA (II)               | 53   | NO                                       | 16.3                              |
| 57 | AO (III)              | 53   | NO                                       | 0.1+                              |
| 58 | GBM (IV)              | 69   | NO                                       | 24.4                              |
| 59 | GBM (IV)              | 70   | YES                                      | 2.6                               |
| 60 | AA (III)              | 67   | NO                                       | 49.5+                             |
| 61 | AA (III)              | 29   | NO                                       | 24.2                              |
| 62 | GBM (IV)              | 64   | NO                                       | 18.5                              |
| 63 | GBM (IV)              | 44   | NO                                       | 15.9                              |
| 64 | OD (II)               | 61   | NO                                       | 49+                               |
| 65 | GBM (IV)              | 82   | NO                                       | 9.9                               |
| 66 | GBM (IV)              | 47   | YES                                      | 16.5                              |
| 67 | OD (II)               | 66   | NO                                       | 2.5                               |
| 68 | GBM (IV)              | 48   | NO                                       | 47.3+                             |
| 69 | GBM (IV)              | 71   | NO                                       | 2.7                               |
| 70 | GBM (IV)              | 76   | NO                                       | 35.7                              |
| 71 | DA (II)               | 29   | NO                                       | 47.1+                             |
| 72 | DA (II)               | 31   | NO                                       | 34.7                              |
| 73 | GBM (IV)              | 73   | NO                                       | 27.2+                             |
| 74 | AA (III)              | 50   | NO                                       | 15.7                              |
| 75 | AA (III)              | 54   | NO                                       | 47.2+                             |
| 76 | AA (III)              | 34   | NO                                       | 49.8+                             |
| 77 | GBM (IV)              | 26   | NO                                       | 16.1                              |
| 78 | OD (II)               | 61   | NO                                       | 16.3                              |
| 79 | GBM (IV)              | 66   | YES                                      | 18.1                              |
| 80 | AA (III)              | 63   | NO                                       | 49.7+                             |

(Continued on following page)

| ID  | Diagnosis (WHO grade) | Age* | Characterized cfDNA alterations detected | OS time form blood draw for cfDNA |
|-----|-----------------------|------|------------------------------------------|-----------------------------------|
| 81  | DA (II)               | 65   | NO                                       | 29.2                              |
| 82  | GBM (IV)              | 54   | YES                                      | 3.8                               |
| 83  | DA (II)               | 63   | NO                                       | 17.7                              |
| 84  | GBM (IV)              | 35   | NO                                       | 7.3                               |
| 85  | DA (II)               | 38   | NO                                       | 19.7                              |
| 86  | GBM (IV)              | 62   | NO                                       | 4                                 |
| 87  | GBM (IV)              | 60   | NO                                       | 5.3                               |
| 88  | GBM (IV)              | 78   | NO                                       | 1.9+                              |
| 89  | GBM (IV)              | 69   | NO                                       | 27.1                              |
| 90  | GBM (IV)              | 62   | NO                                       | 16.7                              |
| 91  | OD (II)               | 32   | NO                                       | 50.2+                             |
| 92  | GBM (IV)              | 58   | NO                                       | 11.9                              |
| 93  | AA (III)              | 23   | NO                                       | 47.4+                             |
| 94  | GBM (IV)              | 60   | NO                                       | 5.9                               |
| 95  | GBM (IV)              | 41   | YES                                      | 4.5                               |
| 96  | GBM (IV)              | 45   | NO                                       | 1.1                               |
| 97  | GBM (IV)              | 53   | NO                                       | 8.9                               |
| 98  | OD (II)               | 45   | NO                                       | 43+                               |
| 99  | GBM (IV)              | 66   | NO                                       | 3.7                               |
| 100 | GBM (IV)              | 49   | NO                                       | 45.1+                             |
| 101 | GBM (IV)              | 61   | YES                                      | 6.6                               |
| 102 | AA (III)              | 73   | NO                                       | 9.7+                              |
| 103 | AA (III)              | 42   | NO                                       | 36.1                              |
| 104 | GBM (IV)              | 63   | NO                                       | 1.2                               |
| 105 | AA (III)              | 25   | YES                                      | 35.5+                             |
| 106 | GBM (IV)              | 49   | NO                                       | 14.2+                             |
| 107 | AA (III)              | 81   | YES                                      | 9.9                               |
| 108 | GBM (IV)              | 63   | NO                                       | 16.6                              |
| 109 | GBM (IV)              | 47   | NO                                       | 7.6+                              |
| 110 | GBM (IV)              | 80   | NO                                       | 3.9+                              |
| 111 | GBM (IV)              | 48   | YES                                      | 4.6+                              |
| 112 | GBM (IV)              | 61   | NO                                       | 6.7                               |
| 113 | GBM (IV)              | 63   | YES                                      | 0.6                               |
| 114 | OD (II)               | 43   | YES                                      | 24.3+                             |
| 115 | GBM (IV)              | 59   | YES                                      | 9.1                               |
| 116 | GBM (IV)              | 62   | NO                                       | 17.2                              |
| 117 | GBM (IV)              | 44   | NO                                       | 2.1                               |
| 118 | GBM (IV)              | 59   | NO                                       | 15.9                              |
| 119 | GBM (IV)              | 53   | NO                                       | 12.9                              |
| 120 | GBM (IV)              | 54   | YES                                      | 7.2                               |

| ID  | Diagnosis (WHO grade) | Age* | Characterized cfDNA alterations detected | OS time form blood draw for cfDNA |
|-----|-----------------------|------|------------------------------------------|-----------------------------------|
| 121 | GBM (IV)              | 44   | NO                                       | 3                                 |
| 122 | GBM (IV)              | 51   | NO                                       | 18.1                              |
| 123 | GBM (IV)              | 59   | YES                                      | 3.8                               |
| 124 | AA (III)              | 55   | NO                                       | 3.8                               |
| 125 | AA (III)              | 40   | YES                                      | 6.4                               |
| 126 | GBM (IV)              | 62   | NO                                       | 8.2                               |
| 127 | DA (II)               | 55   | NO                                       | 9                                 |
| 128 | GBM (IV)              | 59   | YES                                      | 11.5                              |
| 129 | GBM (IV)              | 60   | NO                                       | 11.2+                             |
| 130 | GBM (IV)              | 59   | NO                                       | 13.4                              |
| 131 | GBM (IV)              | 71   | NO                                       | 1.8                               |
| 132 | GBM (IV)              | 58   | NO                                       | 9.3                               |
| 133 | GBM (IV)              | 53   | NO                                       | 8+                                |
| 134 | GBM (IV)              | 66   | NO                                       | 5.2+                              |
| 135 | AA (III)              | 50   | NO                                       | 2.9+                              |

\* At the time of blood draw for cfDNA (years).

**Abbreviations:** AA, anaplastic astrocytoma; AO, anaplastic oligodendroglioma; cfDNA, cell-free DNA; GBM, glioblastoma multiforme; OD, oligodendroglioma; WHO, world health organization.

**Supplementary Figure S1.** Frequency (% of patients) of genomic alterations in tissue-DNA NGS among glioma patients (N=88). Only characterized alterations are shown. A total of 89 different genes were involved (only genes altered in  $\geq 2$  samples are shown\*).

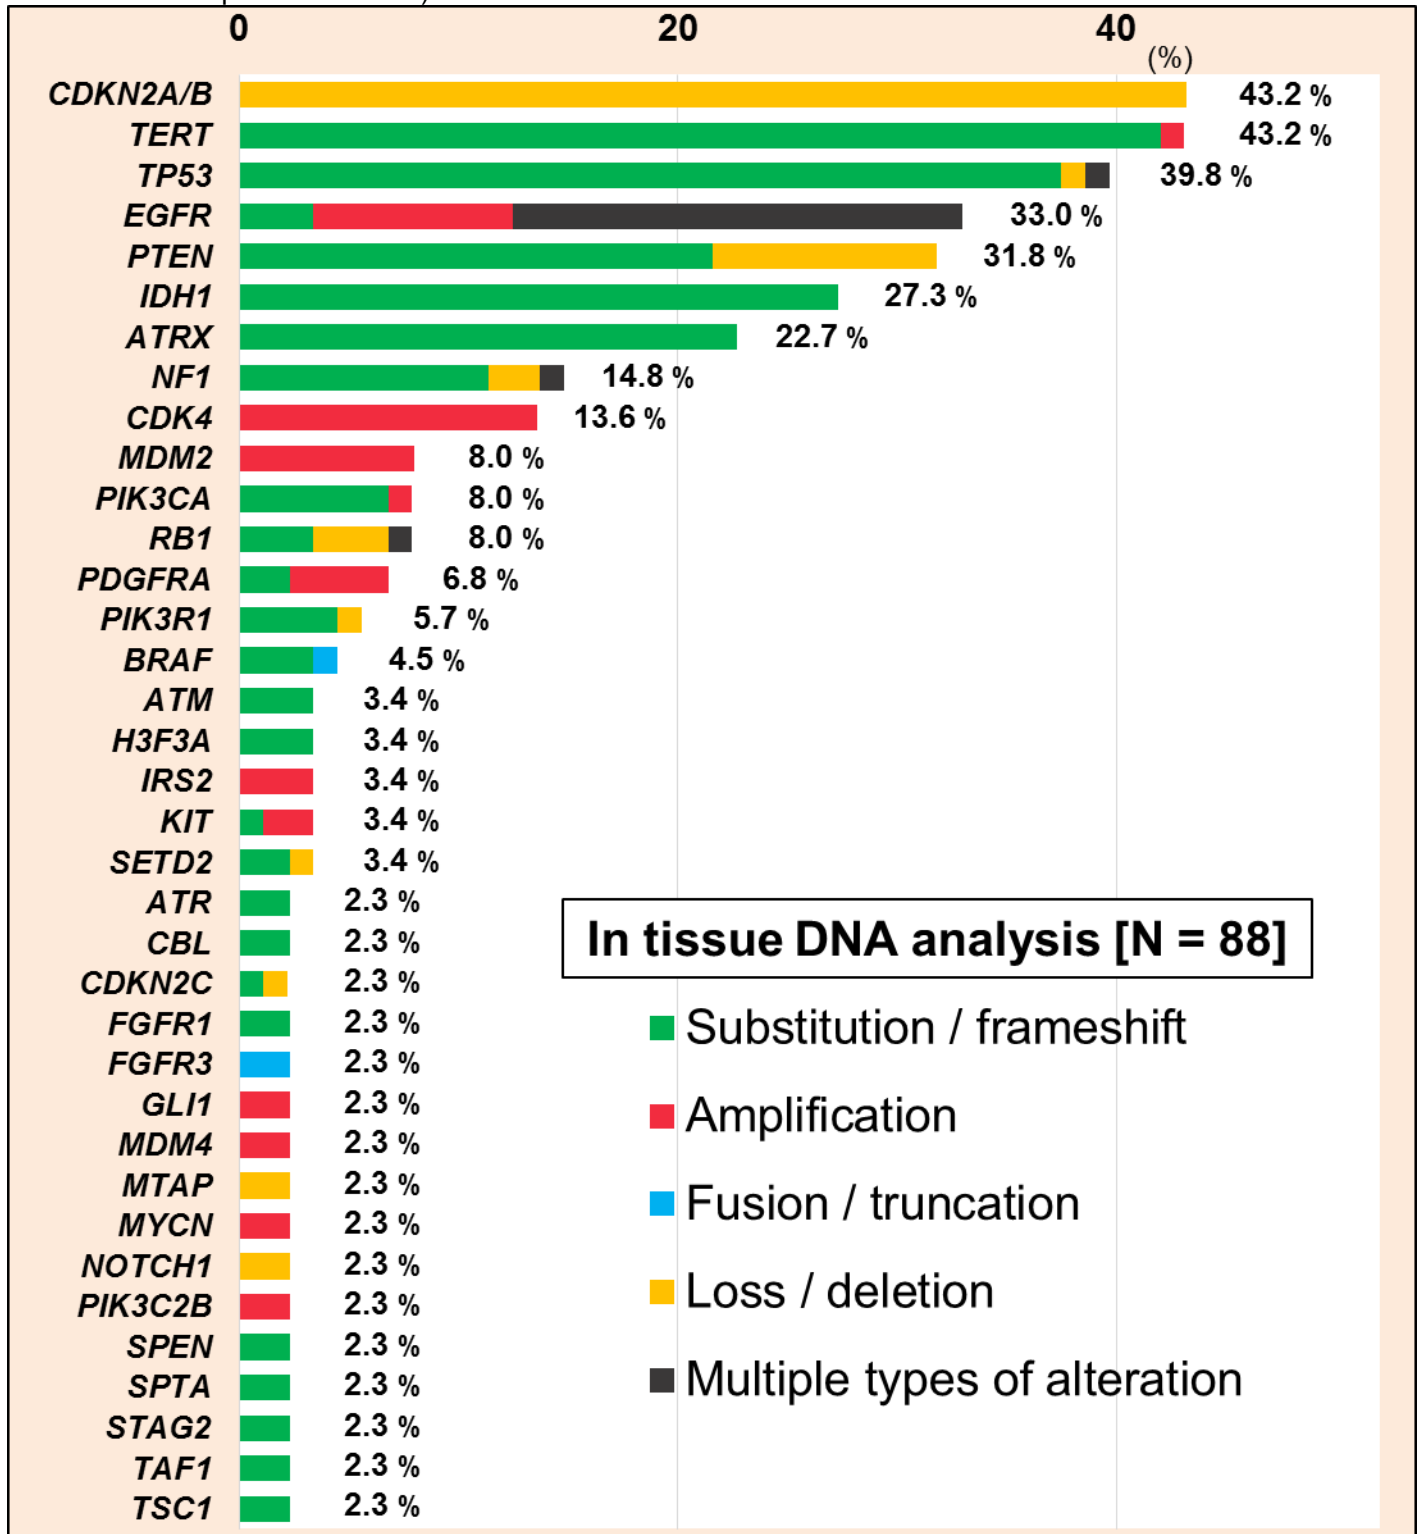

\*The following 53 genes were altered in one sample: ACVR1B, AKT1, AKT3, ARID1A, ARID2, BRIP1, CCNE1, CHD2, CHEK2, CIC, CREBBP, CRKL, CSF1R, CTNNA1, DNMT3A, EP300, ERBB4, FANCA, FANCC, FAS, FAT1, FUBP1, GATA4, HGF, HNF1A, IDH2, JAK2, KDR, KEL, LRP1B, MET, MLL2, MRE11A, MSH2, MUTYH, MYC, NOTCH2, NTRK3, PBRM1, PIK3CG, PLCG2, POLE, PTCH1, PTPN11, QKI, RAD50, SMARCB1, SMO, SOX2, STAT4, TET2, TSC2, and WT1.

**Supplementary Figure S2.** Kaplan-Meier curve for overall survival (OS) from cfDNA blood test depending on the number of characterized cfDNA alterations amongst patients with brain gliomas (N=135).

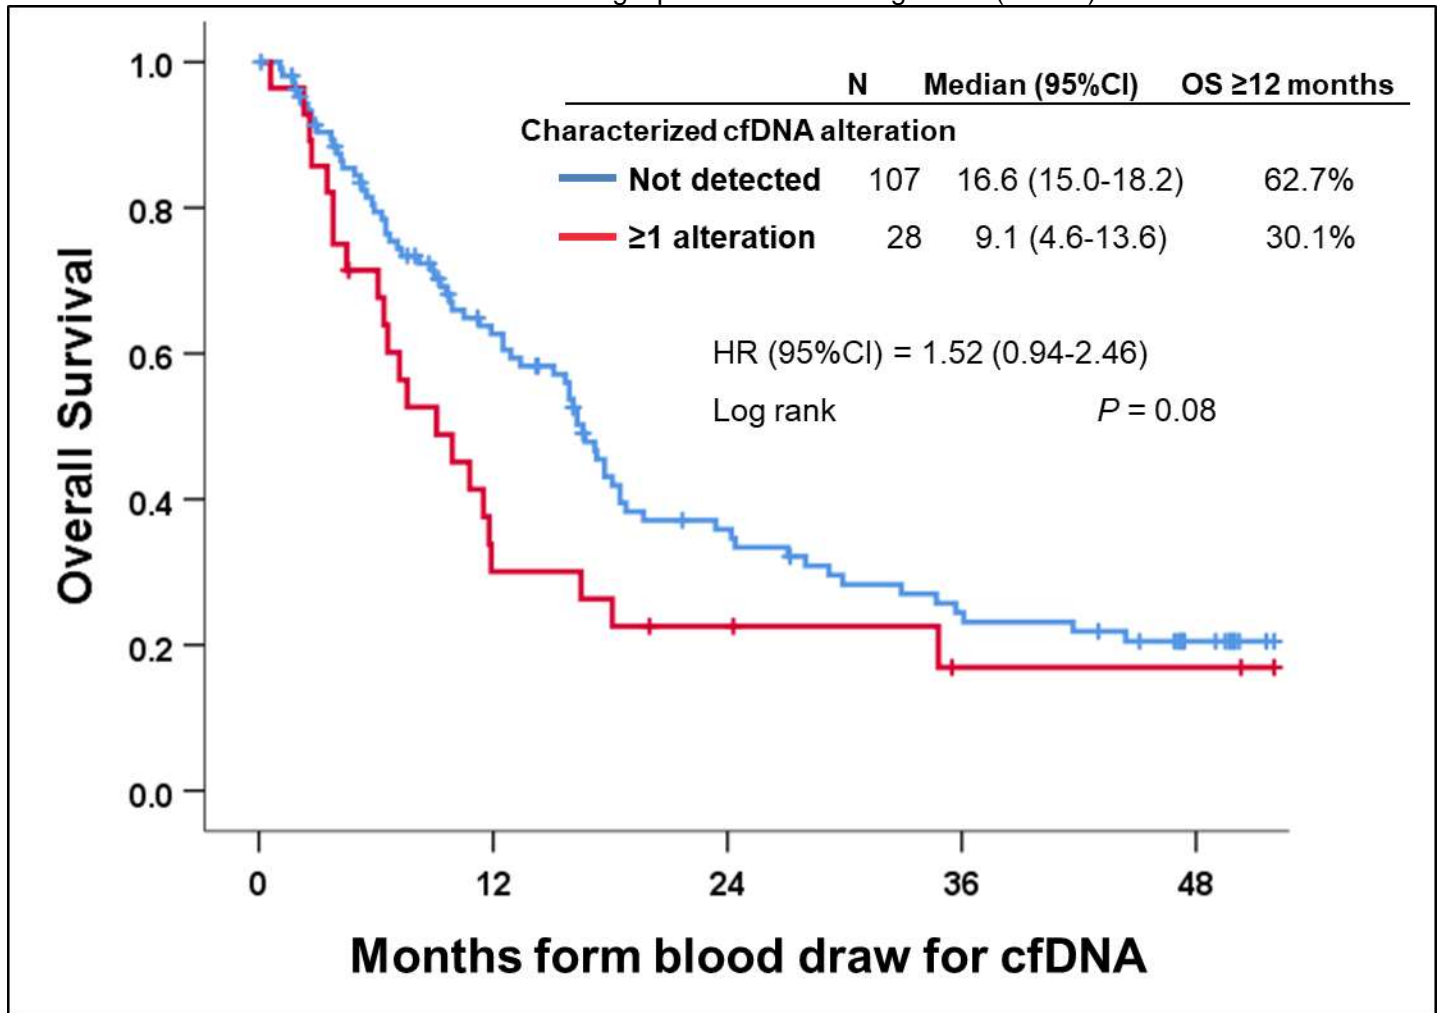

**Supplementary Figure S3.** Detection rate of characterized cfDNA alterations among GBM patients according to presence of tumor diagnosis (N=93).

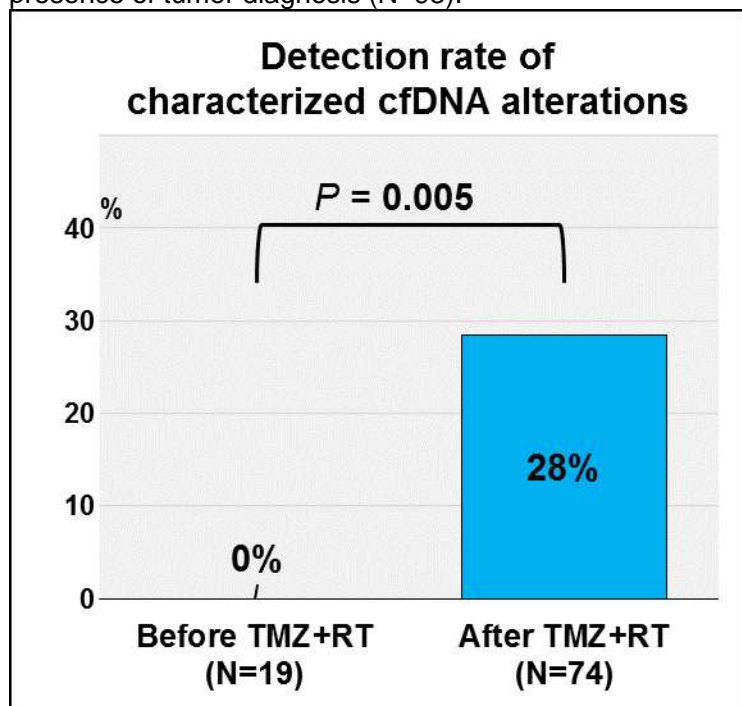

Supplement: IJC-148-2839-s001.pdf [file IJC-148-2839-s001.pdf]
